# Supplementary material for: Deciphering the Role of Multiple Thioredoxin Fold Proteins of Leptospirillum sp. in Oxidative Stress Tolerance
Source: MDPI journal article supplement (doi:10.3390/ijms21051880), 2020-03-10
Supplement: s1 [file s1]

**Table S1.** Oligonucleotides used in this work.

| Target        | Name         | Sequence 5'-3'          | Product Length (bp) |
|---------------|--------------|-------------------------|---------------------|
| <i>tfp1*</i>  | pTfp1-F      | AAGGTTTCGGTCCTCTATGC    | 151                 |
|               | pTfp1-R      | TGAATGGAGTGACGTTGAGC    |                     |
| <i>tfp2*</i>  | pTfp2-F      | CTGGTAATGGTTGATTTCTGGG  | 104                 |
|               | pTfp2-R      | GGAATGCCCATGACCTGATAT   |                     |
| <i>tfp3*</i>  | pTfp3-F      | TGTTCTGATCCGGAAAAACC    | 184                 |
|               | pTfp3-R      | GTCGACCAGAACGACTTTC     |                     |
| <i>tfp4*</i>  | pTfp4-F      | CTGGATTTGGGAAAACTGC     | 113                 |
|               | pTfp4-R      | TCTATTTGACGGGACAGACG    |                     |
| <i>tfp5*</i>  | pTfp5-F      | CATTGATCAGAATGGTGTGG    | 109                 |
|               | pTfp5-R      | CGTCTTTGGTCCTTTGTC      |                     |
| <i>tfp6*</i>  | pTfp6-F      | GACGGACGACACCTTTCAGA    | 138                 |
|               | pTfp6-R      | AGTCTCCCGTGGTACTTTCG    |                     |
| <i>tfp7*</i>  | pTfp7-F      | AGTTTGAGAGCCGTGAAGC     | 163                 |
|               | pTfp7-R      | AAGCCGTGAACCTTTGTATGC   |                     |
| <i>tfp8*</i>  | pTfp8-F      | AAGAAAAATATCCCGACAGC    | 107                 |
|               | pTfp8-R      | GATGGCATAACGTTCAATGG    |                     |
| <i>tfp9*</i>  | pTfp9-F      | CGATTTCTCTCCGCGATGA     | 81                  |
|               | pTfp9-R      | GCAATGTCTTTCAGAACGGG    |                     |
| <i>tfp10*</i> | pTfp10-F     | TATCCGAGAGAAGGTTGTGC    | 119                 |
|               | pTfp10-R     | TGATCTTCCCAAGTTTGACC    |                     |
| <i>tfp11*</i> | pTfp11-F     | AGAGTCTGCAGGACAGAAGC    | 138                 |
|               | pTfp11-R     | TCCTGCTTTCCAAGAATACG    |                     |
| <i>tfp12*</i> | qTfp12-F     | TCGAAACGGCAGATAATACCT   | 80                  |
|               | qTfp12-R     | TTTGACCTGACCACCGACAA    |                     |
| <i>tfp13*</i> | ptfp13-F     | TTGCGATTCCGGACCC        | 108                 |
|               | ptfp13-R     | CTCCRCCAACGACMACG       |                     |
| pBadTOPO      | pBadTopo-R   | GATTTAATCTGTATCAGGCTG   | 335                 |
|               | pBadTopo-F   | ATGCCATAGCATTTTTATCCAT  |                     |
| <i>rrsB*</i>  | pRrsB-F      | TACAAGCTTCCGCTCCTG      | 288                 |
|               | pRrsB-R      | CCGGGCAAAAGTGGTTTACA    |                     |
| <i>tfp1*</i>  | pBad_Tfp1-F  | ATGGCCAAGGTTTCGGTC      | 252                 |
|               | pBad_Tfp1-R  | CTTAAGCGTTTTTCAGGAGGTG  |                     |
| <i>tfp2*</i>  | pBad_Tfp2-F  | GTGGAAGTAAATGCTCCGGA    | 318                 |
|               | pBad_Tfp2-R  | GGACTTGAGAAGAGAGTCAAT   |                     |
| <i>tfp6*</i>  | pBad_Tfp6-F  | ATGGATGAGGATATTCTGATGA  | 471                 |
|               | pBad_Tfp6-R  | GGAAGGGAGCGGGCTGCT      |                     |
| <i>tfp10*</i> | pBad_Tfp10-F | ATGGCTGCTGAAATAAAAGTGGG | 462                 |
|               | pBad_Tfp10-R | CTATTTCAACTGTTCAAGCGC   |                     |
| <i>tfp12*</i> | pBad_Tfp12-F | ATGCAAAAGGTCCCATT       | 765                 |
|               | pBad_Tfp12-R | CTACTTCTTTTGTCGGAG      |                     |
| <i>tfpA**</i> | pTfpA-F      | ATGAGCGATAAAATTATTCACCT | 330                 |
|               | pTfpA-R      | TTACGCCAGGTTAGCGTC      |                     |

(\*) *Leptospirillum* sp. CF-1; (\*\*) *E. coli* K-12.**Table S2.** Relative fold change in mRNA levels of *tfp* genes from *Leptospirillum* sp. CF-1 exposed to oxidative stress with ferric ion or diamide.

| Gene        | Ferric Ion  | Diamide     |          |
|-------------|-------------|-------------|----------|
|             | Increase    | Increase    | Decrease |
| <i>tfp1</i> | -           | 2.43 ± 0.48 |          |
| <i>tfp2</i> | 7.33 ± 4.74 | 2.62 ± 0.39 |          |
| <i>tfp3</i> | 2.25 ± 0.69 | -           | -        |
| <i>tfp4</i> | -           | 5.17 ± 0.24 |          |

|              |              |             |             |
|--------------|--------------|-------------|-------------|
| <i>tfp5</i>  | 8.44 ± 3.38  | -           | -           |
| <i>tfp6</i>  | 5.4 ± 1.36   |             | 0.13 ± 0.01 |
| <i>tfp7</i>  | 4.12 ± 0.29  |             | 0.21 ± 0.02 |
| <i>tfp8</i>  | 2.78 ± 0.14  |             | 0.17 ± 0.05 |
| <i>tfp9</i>  | 10.2 ± 2.27  |             | 0.57 ± 0.12 |
| <i>tfp10</i> | -            | 1.84 ± 0.26 |             |
| <i>tfp11</i> | 5.38 ± 1.30  |             | 0.32 ± 0.07 |
| <i>tfp12</i> | -            |             | 0.33 ± 0.07 |
| <i>tfp13</i> | 18.51 ± 4.95 |             | 0.49 ± 0.13 |

(-), no significant changes.

**Table S3.** Percentage of growth recovering of stressed respect to non-stressed cultures of *tfp*-complemented cells.

| Strain                 | Ferric Ion   | Diamide       |
|------------------------|--------------|---------------|
| <i>E. coli</i> K-12    | 14.20 ± 2.10 | 12.62 ± 0.77  |
| Jem-136                | 15.29 ± 3.25 | 1.35 ± 0.15   |
| Jem-136 / <i>tfp1</i>  | 67.50 ± 1.10 | 66.48 ± 12.26 |
| Jem-136 / <i>tfp2</i>  | 21.47 ± 1.36 | 41.48 ± 1.76  |
| Jem-136 / <i>tfp6</i>  | 54.28 ± 0.32 | 10.47 ± 1.01  |
| Jem-136 / <i>tfp10</i> | 56.70 ± 0.58 | 9.30 ± 1.15   |
| Jem-136 / <i>tfp12</i> | 63.70 ± 0.75 | 6.92 ± 0.54   |
| Jem-136 / <i>trxA</i>  | 25.69 ± 2.02 | 5.69 ± 1.04   |

Growth of non-stressed cells was considered 100%. JEM-136 genotype:  $\Delta trxA \Delta trxC$ .
